# Supplementary material for: Comparative Genomic Analysis Determines the Functional Genes Related to Bile Salt Resistance in Lactobacillus salivarius
Source: MDPI journal article supplement (doi:10.3390/microorganisms9102038), 2021-09-27
Supplement: s1 [file s1]

**Table S1. Primer sequences.**

| Primer                          | Sequence (5'-3')          |
|---------------------------------|---------------------------|
| <b>Strain identification</b>    |                           |
| 27F                             | AGAGTTTGATCMTGGCTCAG      |
| 1492R                           | CGGTTACCTTGTTACGACTT      |
| <b>Bile salt tolerance test</b> |                           |
| LSL_1568-F                      | GAAAGTTTCCTTCCCCACAAGAAG  |
| LSL_1568-R                      | CAACTGGTGCAAAGTCCCAATT    |
| rfaG-F                          | GCGGCTCAAAAAGATGAACGAT    |
| rfaG-R                          | CCAGAAGTCATTGTCCAGGGAAT   |
| LSL_0951-F                      | GGATGCTCCTAAAGAGGTTAAAGC  |
| LSL_0951-R                      | GAAACTTGTCATCCCCATTTC     |
| LSL_1716-F                      | CTGCAGGAACAGGAATGTCAATC   |
| LSL_1716-R                      | GGTATTTTCACACCACCCCTGAT   |
| LSL_1709-F                      | GACAGGTTTGTGGTTAGCTGAAG   |
| LSL_1709-R                      | CGAGGATCTAGAGGAACTTCTCC   |
| LSL_0723-F                      | AGTGGCACCCTAGAAGAATTGAG   |
| LSL_0723-R                      | GCTTGATTTTGGTCTATCTGCGAC  |
| LSL_0261-F                      | GCATCAGCAGCAGATGTTAAAG    |
| LSL_0261-R                      | CCATCAGCTTCAAAGATTGCTCC   |
| LSL_0166-F                      | GTCTCAGGGATAGCCTTGTTGAT   |
| LSL_0166-R                      | CCGCATACTTATATCCTCCTGCA   |
| LSL_0252-F                      | CATAACAGAAGCAGCTAAGCACTG  |
| LSL_0252-R                      | CCCCACCAGCTGTTAGTTCAATA   |
| Uni33F                          | TCCTACGGGAGGCAGCAGT       |
| Uni797R                         | GGACTACCAGGGTATCTATCCTGTT |
| <b>Gene knockout test</b>       |                           |
| up-test-R                       | GTTTTTTTCTAGTCCAAGCTCACA  |
| down-test-F                     | GCCGACTGTACTTTCGGATCCT    |
| LSL_1568-test-F                 | GCATCGGATGGATTTGTAATCC    |
| LSL_1568-test-R                 | CCTGCATCAGTTAAAATTATCGG   |
| LSL_1709-test-F                 | GGACAGTTAATACTGACAGTGA    |
| LSL_1709-test-R                 | CGCGGACACCACC             |
| LSL_1716-test-F                 | CCCAGTAGGATTATTTACGGTT    |
| LSL_1716-test-R                 | CACATCTTCCATTGTTCCG       |
| Ery-F                           | .CGATACCGTTTACGAAATTGG    |
| Ery-R                           | CTTGCTCATAAGTAACGGTAC     |

**Table S2. Detailed information of 90 *Lactobacillus salivarius* strains.**

| Strain | Region<br>(City / Province) | Origin      | Accession No.   |
|--------|-----------------------------|-------------|-----------------|
| NT15M1 | Nantong, Jiangsu            | Human feces | GCA_009863885.1 |
| NT33M2 | Nantong, Jiangsu            | Human feces | GCA_009863585.1 |

| Strain     | Region<br>(City / Province) | Origin      | Accession No.   |
|------------|-----------------------------|-------------|-----------------|
| NT4M8      | Nantong, Jiangsu            | Human feces | GCA_009863835.1 |
| NT62M5     | Nantong, Jiangsu            | Human feces | GCA_009863815.1 |
| NT44M5     | Nantong, Jiangsu            | Human feces | SRR12559554     |
| FJSWX10M2  | Wuxi, Jiangsu               | Human feces | GCA_009863685.1 |
| FJSWX34JL5 | Wuxi, Jiangsu               | Human feces | GCA_009863705.1 |
| FWXBH24M2  | Wuxi, Jiangsu               | Human feces | GCA_009863805.1 |
| FWXBH25M3  | Wuxi, Jiangsu               | Human feces | GCA_009863785.1 |
| FWXBH2M2   | Wuxi, Jiangsu               | Human feces | GCA_009863715.1 |
| FWXBH35M2  | Wuxi, Jiangsu               | Human feces | GCA_009869955.1 |
| FWXBH36M1  | Wuxi, Jiangsu               | Human feces | SRR12559766     |
| FWXBH3M1   | Wuxi, Jiangsu               | Human feces | GCA_009863465.1 |
| FWXBH4M1   | Wuxi, Jiangsu               | Human feces | GCA_009863735.1 |
| FWXBH9M2   | Wuxi, Jiangsu               | Human feces | SRR12559767     |
| JSWX5M1    | Wuxi, Jiangsu               | Human feces | GCA_009863695.1 |
| FWXBH18M5  | Wuxi, Jiangsu               | Human feces | GCA_009863625.1 |
| FJSYZ1L1   | Yangzhou, Jiangsu           | Human feces | SRR12559777     |
| FZJTZ10M2  | Taizhou, Zhejiang           | Human feces | GCA_009863635.1 |
| FZJTZ13M4  | Taizhou, Zhejiang           | Human feces | GCA_009863605.1 |
| FZJTZ15M5  | Taizhou, Zhejiang           | Human feces | SRR12559761     |
| FZJTZ1M1   | Taizhou, Zhejiang           | Human feces | GCA_009863555.1 |
| FZJTZ28M4  | Taizhou, Zhejiang           | Human feces | GCA_009863535.1 |
| FZJTZ57M3  | Taizhou, Zhejiang           | Human feces | SRR12559554     |
| FZJTZ58M1  | Taizhou, Zhejiang           | Human feces | SRR12559558     |
| FZJTZ59M2  | Taizhou, Zhejiang           | Human feces | SRR12559557     |
| FZJTZ63M3  | Taizhou, Zhejiang           | Human feces | SRR12559556     |
| FZJTZ64M3  | Taizhou, Zhejiang           | Human feces | GCA_009865735.1 |
| FZJTZ69M1  | Taizhou, Zhejiang           | Human feces | GCA_009870175.1 |
| FZJTZ9M6   | Taizhou, Zhejiang           | Human feces | GCA_009865705.1 |
| FSDHSD3L5  | Hezhe, Shandong             | Human feces | GCA_009863485.1 |
| FSDLZ17M12 | Laizhou, Shandong           | Human feces | GCA_009870365.1 |
| FSDLZ18M1  | Laizhou, Shandong           | Human feces | GCA_009865815.1 |
| FSDLZ19M1  | Laizhou, Shandong           | Human feces | SRR12560180     |
| FSDLZ20M1  | Laizhou, Shandong           | Human feces | SRR12559768     |
| FAHBZ8M2   | Haozhou, Anhui              | Human feces | GCA_009863415.1 |
| FFJND2L3   | Ningde, Fujian              | Human feces | SRR12559781     |
| FHuBJZ11L3 | Jingzhou, Hubei             | Human feces | GCA_009863365.1 |
| FHNXY27L3  | Xinyang, Henan              | Human feces | GCA_009863405.1 |
| FHNXY73M9  | Xinyang, Henan              | Human feces | GCA_009869975.1 |
| HN18M5     | Unknown, Henan              | Human feces | SRR12559555     |
| HN24M2     | Unknown, Henan              | Human feces | GCA_009870225.1 |
| HN26M4     | Unknown, Henan              | Human feces | GCA_009866085.1 |
| FGDLZ18M3  | Leizhou, Guangdong          | Human feces | GCA_009870335.1 |

| Strain       | Region<br>(City / Province) | Origin      | Accession No.   |
|--------------|-----------------------------|-------------|-----------------|
| FGDLZ19M2    | Leizhou, Guangdong          | Human feces | SRR12559779     |
| FGDLZ35M2    | Xining, Qinghai             | Human feces | GCA_009866275.1 |
| FNMGHLBE11L1 | Hulunbeier, Nei Mongol      | Human feces | SRR12559776     |
| FNMGHLBE13L1 | Hulunbeier, Nei Mongol      | Human feces | GCA_009870285.1 |
| FNMGHLBE2L7  | Hulunbeier, Nei Mongol      | Human feces | GCA_009870295.1 |
| FNMGHLBE7L1  | Hulunbeier, Nei Mongol      | Human feces | GCA_009866265.1 |
| FNMGHLBE8L1  | Hulunbeier, Nei Mongol      | Human feces | GCA_009863295.1 |
| FBJSY20M2    | Shunyi, Beijing             | Human feces | GCA_009866235.1 |
| FBJSY61M2    | Shunyi, Beijing             | Human feces | SRR12559783     |
| FXJCJ21M6    | Changji, Xinjiang           | Human feces | SRR12559765     |
| FXJCJ23M1    | Changji, Xinjiang           | Human feces | GCA_009866205.1 |
| FXJCJ7M2     | Changji, Xinjiang           | Human feces | GCA_009865985.1 |
| FXJCJ9M2     | Changji, Xinjiang           | Human feces | GCA_009870255.1 |
| FXJKS17M7    | Kashi, Xinjiang             | Human feces | GCA_009866185.1 |
| FXJKS25M8    | Kashi, Xinjiang             | Human feces | GCA_009866125.1 |
| FXJSW20M4    | Shawan, Xinjiang            | Human feces | SRR12559764     |
| FXJSW2M3     | Shawan, Xinjiang            | Human feces | GCA_009866115.1 |
| FXJWS41M2    | Wusu, Xinjiang              | Human feces | GCA_009866135.1 |
| FXJWS6M4     | Wusu, Xinjiang              | Human feces | GCA_009866105.1 |
| FGSYC2M4     | Yongchang, Gansu            | Human feces | SRR12559778     |
| FGSYC47M10   | Yongchang, Gansu            | Human feces | GCA_009866015.1 |
| FQHYN39M3    | Xining, Qinghai             | Human feces | SRR12559775     |
| FQHYN76M7    | Xining, Qinghai             | Human feces | SRR12559773     |
| FQHYN78M1    | Xining, Qinghai             | Human feces | SRR12559772     |
| FQHYN79M10   | Xining, Qinghai             | Human feces | SRR12559771     |
| FNXYC6M7     | Yinchuan, Ningxia           | Human feces | GCA_009865995.1 |
| FYNDL2M4     | Dali, Yunnan                | Human feces | GCA_009865965.1 |
| FYNDL3M7     | Dali, Yunnan                | Human feces | SRR12559762     |
| FYNDL5M1     | Dali, Yunnan                | Human feces | GCA_009869985.1 |
| FYNDL6M3     | Dali, Yunnan                | Human feces | GCA_009866035.1 |
| FYNLJ23M2    | Lijiang Yunnan              | Human feces | GCA_009865755.1 |
| FCQHC3L6     | Hechuan, Chongqing          | Human feces | SRR12559782     |
| FCQHC8L1     | Hechuan, Chongqing          | Human feces | GCA_009865895.1 |
| FCQNA25M6    | Nanan, Chongqing            | Human feces | GCA_009865885.1 |
| FJLHD10M2    | Huadian, Jilin              | Human feces | GCA_009865865.1 |
| FJLHD14M6    | Huadian, Jilin              | Human feces | GCA_009863905.1 |
| FJLHD16M3    | Huadian, Jilin              | Human feces | GCA_009865785.1 |
| FJLHD18M1    | Huadian, Jilin              | Human feces | GCA_009863515.1 |
| FJLHD24M1    | Huadian, Jilin              | Human feces | GCA_009863595.1 |
| FJLHD25M7    | Huadian, Jilin              | Human feces | GCA_009863435.1 |
| FJLHD2M8     | Huadian, Jilin              | Human feces | GCA_009870215.1 |
| FJLHD4M1     | Huadian, Jilin              | Human feces | GCA_009866025.1 |

| Strain   | Region<br>(City / Province) | Origin      | Accession No.   |
|----------|-----------------------------|-------------|-----------------|
| FJLHD7M2 | Huadian, Jilin              | Human feces | GCA_009865905.1 |
| FJLHD9M1 | Huadian, Jilin              | Human feces | GCA_009865925.1 |
| 6M2      | Unknown                     | Human feces | GCA_009870355.1 |
| E6M1     | Unknown                     | Human feces | GCA_009863495.1 |

**Table S3. Five groups of functional genes.**

| Group                       | Gene                 |
|-----------------------------|----------------------|
| PTS related genes           | <i>LSL_1716</i>      |
|                             | <i>LSL_1715</i>      |
|                             | <i>LSL_1714</i>      |
|                             | <i>LSL_1713</i>      |
|                             | <i>LSL_1712</i>      |
|                             | <i>LSL_1711</i>      |
|                             | <i>Udp</i>           |
| hydrolases                  | <i>LSL_1568</i>      |
|                             | <i>LSL_0995</i>      |
|                             | <i>LSL_1712</i>      |
| glycosyl transferase        | <i>rfaG</i>          |
|                             | <i>rfaB</i>          |
| glutamine amido transferase | <i>LSL_1709</i>      |
| hypothetical protein        | <i>IV45_GL000804</i> |
|                             | <i>LSL_0951</i>      |

\*NB: Red represents genes tested by qRT-PCR.

**Table S4. Survival rates of 90 *L. salivarius* strains in 0.3% bile salt solutions.**

| Strain           | Survival rates (%)<br>(Mean ± SD) | Strain           | Survival rates (%)<br>(Mean ± SD) |
|------------------|-----------------------------------|------------------|-----------------------------------|
| NT15M1           | 5.49 ± 2.62                       | FGDLZ18M3        | 0.80 ± 3.50                       |
| NT33M2           | 1.70 ± 1.36                       | <i>FGDLZ19M2</i> | 13.49 ± 4.50                      |
| NT4M8            | 6.19 ± 1.19                       | <i>FGDLZ35M2</i> | 12.71 ± 3.97                      |
| NT62M5           | 2.64 ± 0.71                       | 6M2              | 1.80 ± 0.85                       |
| <i>NT44M5</i>    | 13.50 ± 3.78                      | E6M1             | 4.68 ± 1.91                       |
| FJSWX10M2        | 7.78 ± 1.61                       | FNMGHLBE11L1     | 2.55 ± 1.02                       |
| FJSWX34JL5       | 4.43 ± 2.02                       | FNMGHLBE13L1     | 2.39 ± 1.51                       |
| FWXBH24M2        | 4.02 ± 2.85                       | FNMGHLBE2L7      | 3.88 ± 1.92                       |
| FWXBH25M3        | 6.79 ± 2.02                       | FNMGHLBE7L1      | 1.21 ± 0.80                       |
| FWXBH2M2         | 1.17 ± 0.90                       | FNMGHLBE8L1      | 3.89 ± 1.21                       |
| FWXBH35M2        | 6.22 ± 2.48                       | FBJSY20M2        | 4.84 ± 0.71                       |
| <i>FWXBH36M1</i> | 17.76 ± 2.66                      | FBJSY61M2        | 3.10 ± 3.54                       |
| FWXBH3M1         | 5.38 ± 1.41                       | FJLHD7M2         | 4.26 ± 1.61                       |
| FWXBH4M1         | 4.39 ± 2.12                       | <i>FJLHD9M1</i>  | 9.72 ± 1.63                       |

| Strain           | Survival rates (%)<br>(Mean $\pm$ SD) | Strain          | Survival rates (%)<br>(Mean $\pm$ SD) |
|------------------|---------------------------------------|-----------------|---------------------------------------|
| <b>FWXBH9M2</b>  | 10.76 $\pm$ 3.53                      | FXJCJ21M6       | 2.40 $\pm$ 2.07                       |
| JSWX5M1          | 2.30 $\pm$ 2.83                       | FXJCJ23M1       | 5.88 $\pm$ 4.09                       |
| FWXBH18M5        | 5.17 $\pm$ 2.12                       | FXJCJ7M2        | 7.94 $\pm$ 1.19                       |
| FJSYZ1L1         | 8.61 $\pm$ 2.02                       | FXJCJ9M2        | 7.32 $\pm$ 4.07                       |
| FZJTZ10M2        | 2.65 $\pm$ 1.75                       | FXJKS17M7       | 4.75 $\pm$ 3.78                       |
| <b>FZJTZ13M4</b> | 0.57 $\pm$ 0.50                       | FXJKS25M8       | 1.24 $\pm$ 0.51                       |
| <b>FZJTZ15M5</b> | 0.46 $\pm$ 0.74                       | FXJSW20M4       | 9.66 $\pm$ 3.68                       |
| FZJTZ1M1         | 0.79 $\pm$ 0.85                       | FXJSW2M3        | 4.12 $\pm$ 1.78                       |
| FZJTZ28M4        | 2.29 $\pm$ 1.95                       | FXJWS41M2       | 2.50 $\pm$ 1.85                       |
| FZJTZ57M3        | 1.01 $\pm$ 1.50                       | FXJWS6M4        | 4.81 $\pm$ 1.36                       |
| FZJTZ58M1        | 1.26 $\pm$ 1.50                       | FGSYC2M4        | 6.42 $\pm$ 1.41                       |
| <b>FZJTZ59M2</b> | 0.39 $\pm$ 0.50                       | FGSYC47M10      | 8.66 $\pm$ 2.90                       |
| FZJTZ63M3        | 2.43 $\pm$ 2.12                       | FQHYN39M3       | 2.5 $\pm$ 1.78                        |
| FZJTZ64M3        | 5.83 $\pm$ 3.26                       | FQHYN76M7       | 1.56 $\pm$ 1.11                       |
| FZJTZ69M1        | 6.17 $\pm$ 2.12                       | FQHYN78M1       | 1.24 $\pm$ 1.78                       |
| FZJTZ9M6         | 3.24 $\pm$ 1.61                       | FQHYN79M10      | 6.25 $\pm$ 1.36                       |
| FSDHSD3L5        | 2.69 $\pm$ 1.54                       | <b>FNXYC6M7</b> | 10.08 $\pm$ 1.41                      |
| FSDLZ17M12       | 7.16 $\pm$ 2.50                       | FYNDL2M4        | 2.78 $\pm$ 2.36                       |
| FSDLZ18M1        | 1.93 $\pm$ 1.01                       | FYNDL3M7        | 6.52 $\pm$ 2.66                       |
| FSDLZ19M1        | 1.18 $\pm$ 1.21                       | <b>FYNDL5M1</b> | 0.02 $\pm$ 0.51                       |
| FSDLZ20M1        | 3.75 $\pm$ 1.61                       | FYNDL6M3        | 0.88 $\pm$ 0.97                       |
| FAHBZ8M2         | 7.23 $\pm$ 2.02                       | FYNLJ23M2       | 1.63 $\pm$ 1.50                       |
| FFJND2L3         | 1.78 $\pm$ 3.54                       | <b>FCQHC3L6</b> | 0.04 $\pm$ 0.54                       |
| FHuBJZ11L3       | 3.19 $\pm$ 1.50                       | FCQHC8L1        | 3.78 $\pm$ 2.49                       |
| <b>FHNXY27L3</b> | 0.62 $\pm$ 1.75                       | FCQNA25M6       | 1.35 $\pm$ 0.51                       |
| FHNXY73M9        | 2.78 $\pm$ 1.50                       | FJLHD10M2       | 4.3 $\pm$ 2.95                        |
| HN18M5           | 5.73 $\pm$ 1.24                       | FJLHD14M6       | 8.73 $\pm$ 0.71                       |
| <b>HN24M2</b>    | 11.84 $\pm$ 2.02                      | FJLHD16M3       | 3.25 $\pm$ 1.61                       |
| HN26M4           | 3.96 $\pm$ 1.42                       | FJLHD18M1       | 1.15 $\pm$ 3.50                       |
| FJLHD2M8         | 9.66 $\pm$ 0.71                       | FJLHD24M1       | 1.35 $\pm$ 1.02                       |
| FJLHD4M1         | 6.32 $\pm$ 2.78                       | FJLHD25M7       | 3.91 $\pm$ 2.01                       |

\*NB: Strain names in red represent strains with survival rates higher than 9.5%; strain names in green represent strains with survival rates lower than 0.7%.

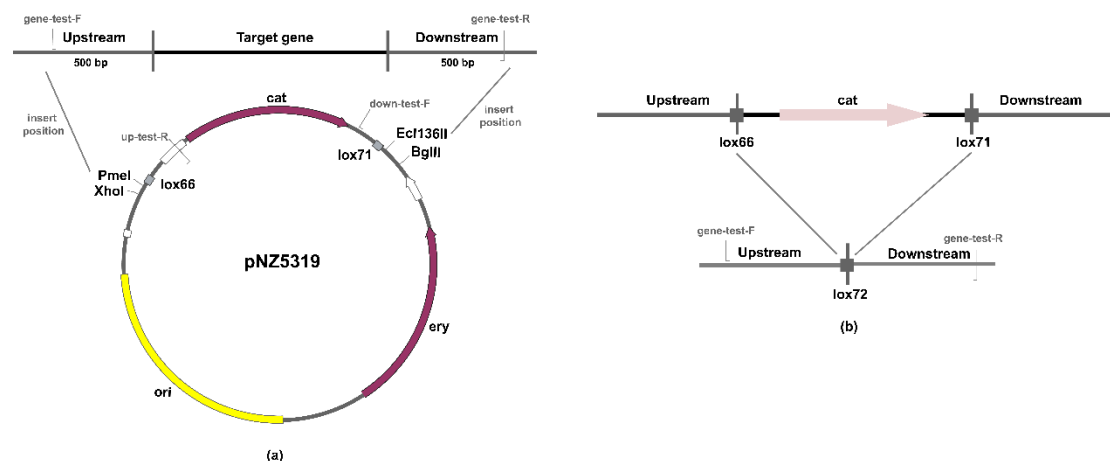

**Figure S1. The gene knockout strategy.** (a) The construction of gene-specific vector. Target gene represents *LSL\_1568*, *LSL\_1716* and *LSL\_1709*. Gene-test-F and gene-test-R represent the test primers for the upstream and downstream sequences respectively in the transformants. Up-test-R and down-test-F represent the test primers for the plasmid sequence in the transformants. (b) Cre-mediated mutant locus resolution. Gene-test-F and gene-test-R represent the same primers in (a).

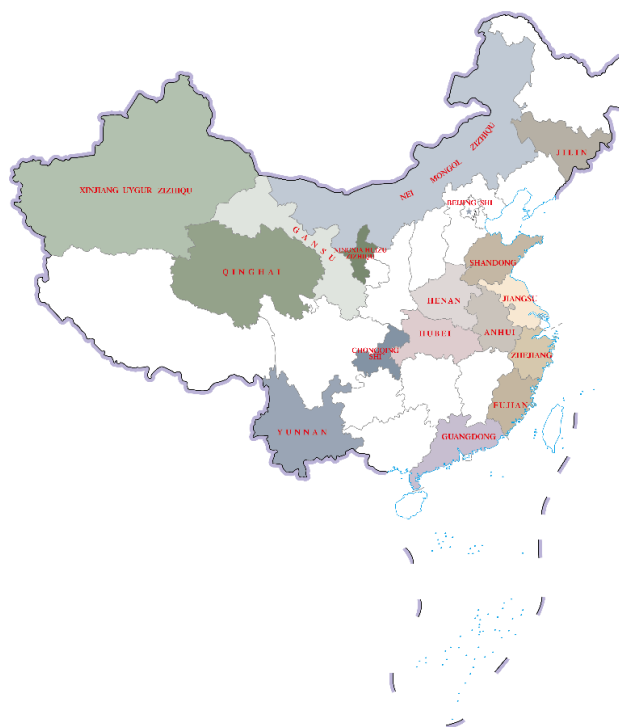

**Figure S2. The isolated regions of 90 *Lactobacillus salivarius* strains.**

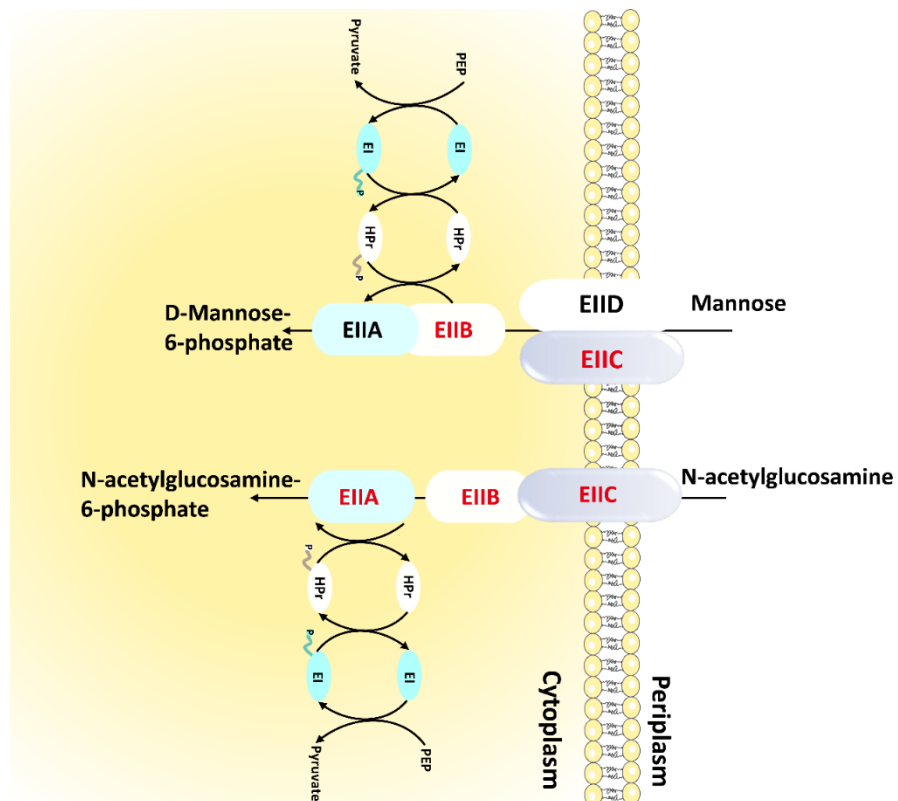

**Figure S3. The specific PTS pathway in two group of strains identified by KEGG. Red represents the corresponding genes were variable in two groups.**

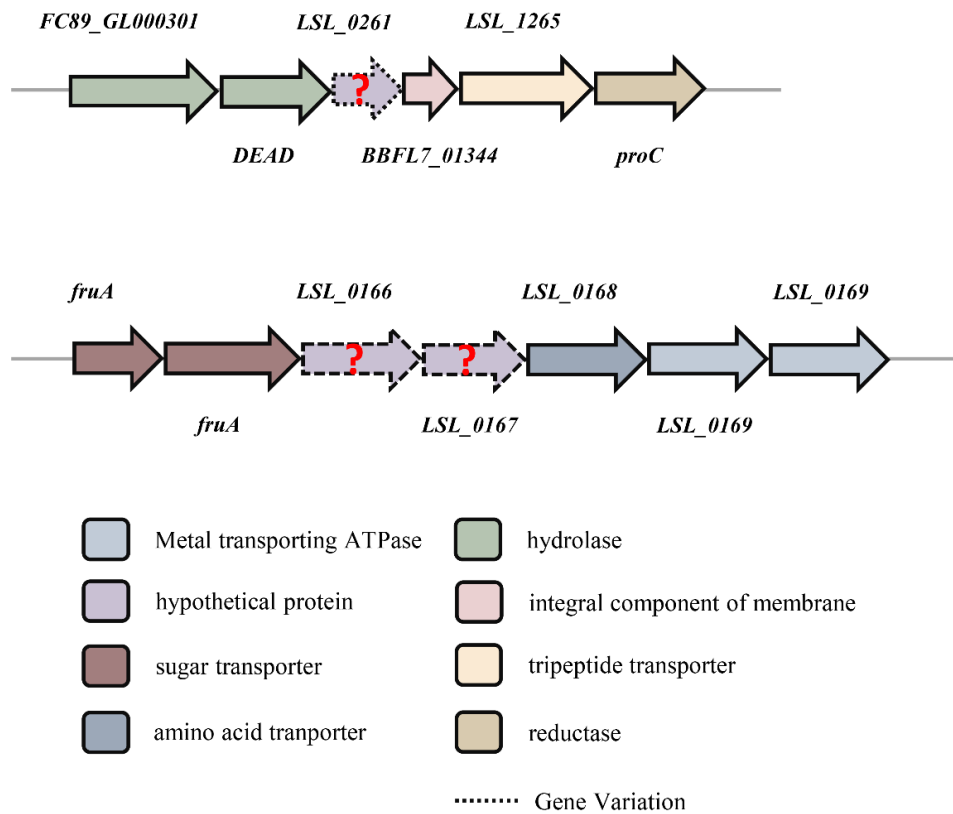

**Figure S4.** The upstream and downstream genes of the unknown redundant genes and their functions in *L. salivarius* strains FYNDL5M1.

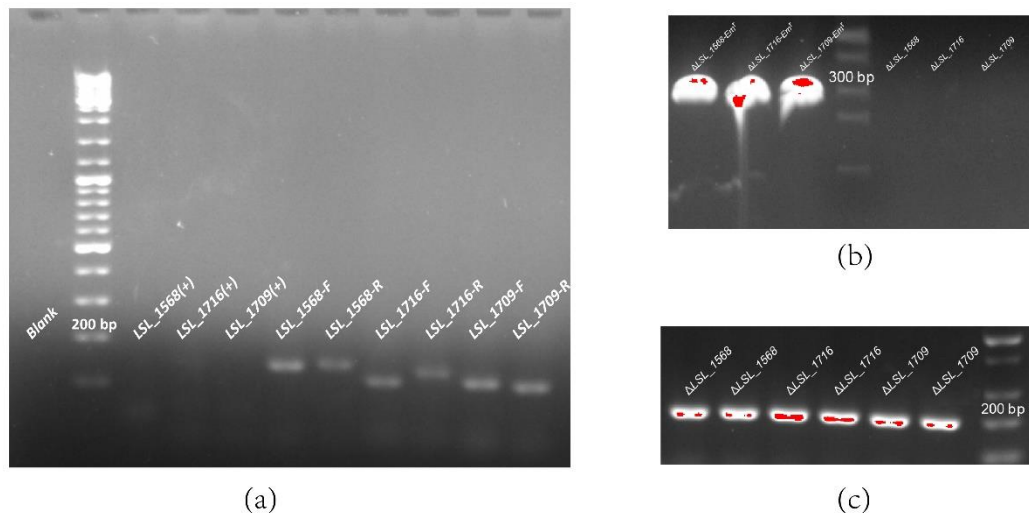

**Figure S5.** The DNA electrophoresis of three mutant strains. (a) Confirmation of double-crossover mutants.(+) represents the wild type strains; (b) Confirmation of the Em<sup>r</sup> colonies. The left three bands of the DNA marker represent Em<sup>r</sup> colonies selected via MRS plates with erythromycin. The right three bands represent the in-frame mutants deleting the Cre-expression vectors. (c) Confirmation of in-frame mutants. The PCR tests were conducted twice for each strain.
